# Supplementary material for: The Allelic Context of the C797S Mutation Acquired upon Treatment with Third-Generation EGFR Inhibitors Impacts Sensitivity to Subsequent Treatment Strategies
Source: Oxford University Press journal article supplement (doi:10.1158/1078-0432.ccr-15-0560), 2015-05-11
Supplement: 10780432ccr150560-sup-146198_1_supp_2959118_nnmgxz.docx [file 10780432ccr150560-sup-146198_1_supp_2959118_nnmgxz.docx]

Supplemental Figure 1 - MGH121 Res # 1 cells exhibit amplification of EGFR with C797S. A) qPCR of EGFR from the indicated gDNA templates. Reactions were carried out in triplicate and error bars representing standard error of the mean are shown. B) Variant allele frequencies for the T790M and C797S mutations from MGH121 parental and MGH121 Res # 1 cells.
